# Supplementary material for: Long-Term Outcomes in IgA Nephropathy
Source: PubMed Central journal article supplement — Clin J Am Soc Nephrol. 2023 Apr 13;18(6):727–38. doi: 10.2215/CJN.0000000000000135 (PMC10278810; doi:10.2215/cjn.0000000000000135), 2023-04-13
Supplement: cjasn-18-727-s001.pdf [file cjasn-18-727-s001.pdf]

## Supplemental Material Table of Contents

- Supplemental Methods
  - Description of RaDaR
  - Calculation of time-averaged proteinuria
- Supplemental Table 1. Description of Populations 1–4
- Supplemental Figure 1. Study population disposition
- Supplemental Figure 2. Venn diagram displaying the degree of overlap between proteinuria subpopulations
- Supplemental Table 2. Univariable and multivariable analysis of 10-year survival and eGFR slope (Full-Analysis Population)
- Supplemental Table 3. Demographic and clinical characteristics at diagnosis and clinical outcomes during follow-up (Populations 1–4)
- Supplemental Table 4. Clinical outcomes in proteinuria analysis Population 1
- Supplemental Table 5. Clinical outcomes in proteinuria analysis Populations 2 and 3
- Supplemental Table 6. Clinical outcomes in proteinuria analysis Population 4
- Supplemental Table 7. Univariable and multivariable analysis of 10-year survival and eGFR slope (Populations 1–4)

## **Supplemental Methods**

### **Description of RaDaR**

In total, 87 sites have recruited at least one patient to the RaDaR IgA nephropathy cohort, and 49 sites have recruited over 20 patients each. Mandatory data fields are required to be completed when a patient is recruited, and optional data fields are available to capture information about pathology reports, disease progressions, etc. In addition to these data, some patients have linkage to historical blood results and medication data supporting longitudinal analysis. Dialysis and transplant data from the UK Renal Registry (UKRR) was used to enrich the data recorded in RaDaR. Patients registered for RaDaR have given consent for their past, present, and future clinical data to be used for ongoing and future research into kidney diseases and related conditions.

To assess whether there is recruitment bias into RaDaR two methods were used. In the first, all patients with IgA nephropathy eligible for recruitment into RaDaR from two large renal centers were compared. No differences were observed in the ethnicity of recruited and non-recruited patients at each center (Chi-squared test;  $P=0.71$ ,  $P=0.80$  respectively). In the second, individuals in the RaDaR IgA nephropathy cohort who had reached kidney failure were compared with patients in the UKRR with a recorded primary renal disease of IgA nephropathy. The UKRR collects data on individuals receiving KRT from all renal centers in the UK. There was strong evidence that RaDaR IgA nephropathy patients with kidney failure were more likely to be White (85% vs. 79%,  $P<0.001$ ) and less likely to be Asian (10% vs 15%,  $P<0.001$ ) when compared with the UKRR dataset.

### **Calculation of Time-Averaged Proteinuria**

The time-weighted averages for urinary protein-creatinine ratio (UPCR) used to define time-averaged proteinuria were calculated from the area under the curve of serial measurements

divided by the length of follow-up. In order to calculate time-averaged proteinuria across a window, it was necessary to extrapolate proteinuria prior to the first observation in the window and after the final observation in the window, a first observation carried back and last observation carried forward approach was applied to form a complete curve.

eGFR slope was calculated as an annualized value. From the beginning of the time-period for which the eGFR slope was being calculated, mean averages were calculated for all eGFR values falling in 0-3months, 3-6 months etc. up until the earliest of the end of the specified time-period, and all-cause mortality/kidney failure. These mean averages were used for calculating eGFR slope using linear mixed-models with random slope and intercept. As a sensitivity analysis, eGFR slopes were calculated excluding episodes of AKI. No significant differences in outcomes or associations were observed.

**Supplemental Table 1. Description of Populations 1–4**

|                           | <b>Population 1</b>                                                                                                                                       | <b>Population 2</b>                                                                                                                                                                                                                           | <b>Population 3</b>                                                                                                                                                                                                   | <b>Population 4</b>                                                                                                                                                                                                                                                 |
|---------------------------|-----------------------------------------------------------------------------------------------------------------------------------------------------------|-----------------------------------------------------------------------------------------------------------------------------------------------------------------------------------------------------------------------------------------------|-----------------------------------------------------------------------------------------------------------------------------------------------------------------------------------------------------------------------|---------------------------------------------------------------------------------------------------------------------------------------------------------------------------------------------------------------------------------------------------------------------|
| <b>Surrogate for</b>      | Incident population                                                                                                                                       | Incident population                                                                                                                                                                                                                           | Prevalent population                                                                                                                                                                                                  | Prevalent clinical trial population                                                                                                                                                                                                                                 |
| <b>Baseline date</b>      | Diagnosis                                                                                                                                                 | Diagnosis                                                                                                                                                                                                                                     | First UPCR value more than 6 months after diagnosis                                                                                                                                                                   | First UPCR value > 0.88 g/g*, more than 6 months after diagnosis                                                                                                                                                                                                    |
| <b>Inclusion criteria</b> | <ol style="list-style-type: none"> <li>1. UPCR value in first 2 years of follow-up</li> <li>2. Additional UPCR value if follow-up &gt; 3 years</li> </ol> | <ol style="list-style-type: none"> <li>1. UPCR value in first 2 years of follow-up</li> <li>2. Additional UPCR value if follow-up &gt; 3 years</li> <li>3. UPCR value in window 6 months before baseline to 1 month after baseline</li> </ol> | <ol style="list-style-type: none"> <li>1. UPCR value at least 6 months after diagnosis</li> <li>2. UPCR value at least 6 months after baseline</li> <li>3. Additional UPCR value if follow-up &gt; 3 years</li> </ol> | <ol style="list-style-type: none"> <li>1. UPCR value &gt; 880 at least 6 months after diagnosis</li> <li>2. eGFR &gt; 30 at baseline</li> <li>3. UPCR value at least 6 months after baseline</li> <li>4. Additional UPCR value if follow-up &gt; 3 years</li> </ol> |

**Abbreviations:** eGFR, estimated glomerular filtration rate; UPCR, urinary protein-creatinine ratio.

\* 0.88 g/g = 100 mg/mmol (~1 g/day)

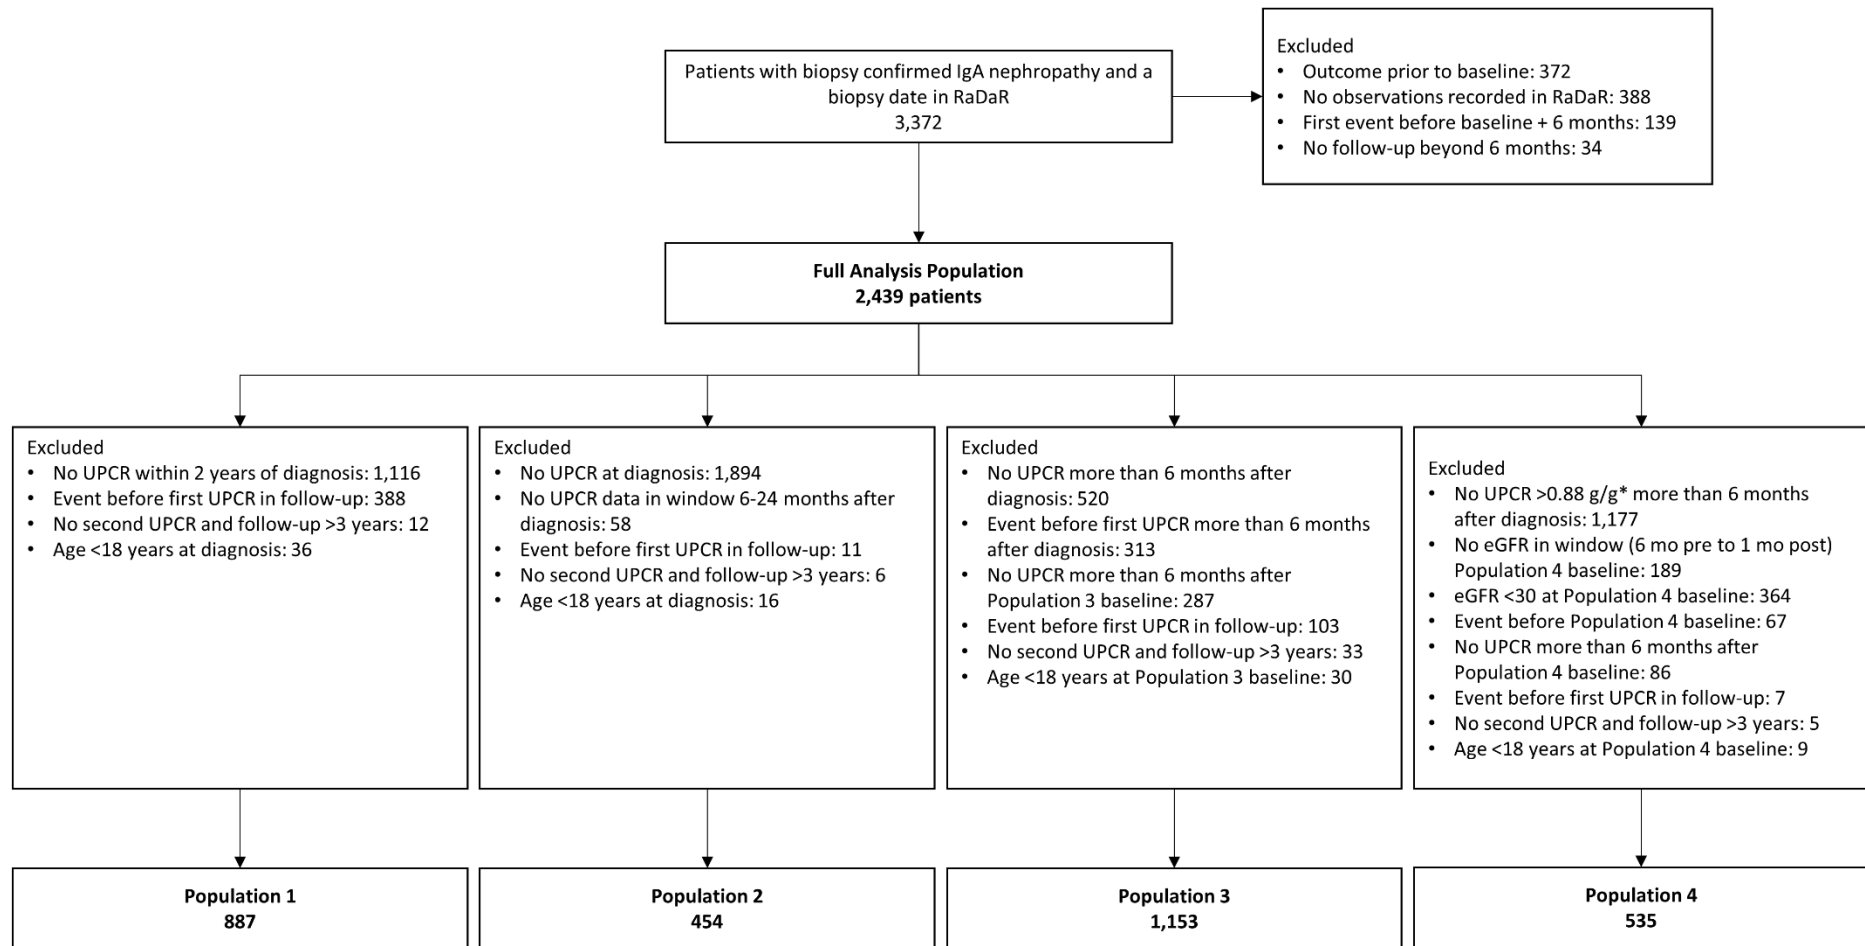

### Supplemental Figure 1. Study population disposition

**Abbreviations:** eGFR, estimated glomerular filtration rate; RaDaR, Registry of Rare Kidney Diseases; UPCR, urinary protein-creatinine ratio.

Patient disposition for the Full-Analysis Population and Populations 1–4.

\* 0.88 g/g = 100 mg/mmol (~1 g/day).

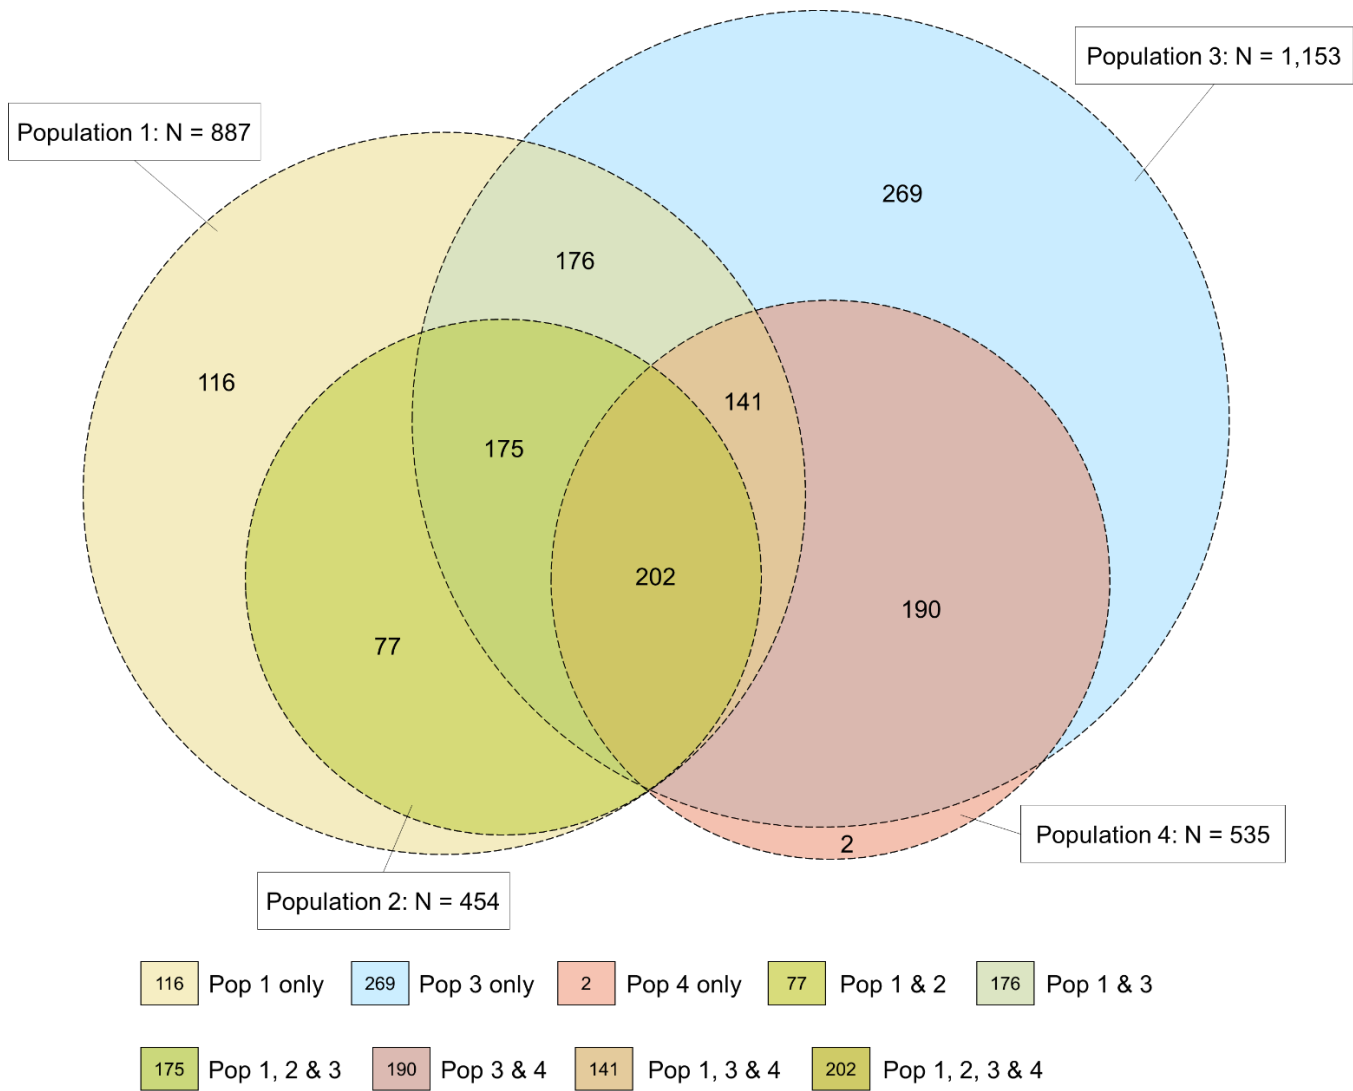

**Supplemental Figure 2. Venn diagram displaying the degree of overlap between proteinuria subpopulations**

**Supplemental Table 2. Univariable and multivariable analysis of 10-year survival and eGFR slope (Full-Analysis Population)**

|                         | Variable  | Reference | Univariable analysis |           | Multivariable analysis |           |
|-------------------------|-----------|-----------|----------------------|-----------|------------------------|-----------|
|                         |           |           | HR                   | P > ChiSq | HR                     | P > ChiSq |
| <b>10-year survival</b> |           |           |                      |           |                        |           |
| <b>Age (10-years)</b>   |           |           | 1.18 (1.14, 1.23)    | <.001     | 1.11 (1.06, 1.15)      | <.001     |
| <b>Gender</b>           | Female    | Male      | 0.74 (0.65, 0.85)    | <.001     | 0.80 (0.70, 0.91)      | 0.001     |
| <b>Ethnicity</b>        | Asian     | White     | 1.26 (1.04, 1.52)    | 0.02      | 1.36 (1.12, 1.64)      | 0.002     |
|                         | Black     | White     | 1.27 (0.79, 2.02)    | 0.32      | 1.18 (0.73, 1.88)      | 0.50      |
|                         | Missing   | White     | 1.01 (0.83, 1.22)    | 0.95      | 1.02 (0.84, 1.24)      | 0.86      |
|                         | Mixed     | White     | 0.88 (0.37, 2.13)    | 0.79      | 1.18 (0.49, 2.86)      | 0.71      |
|                         | Other     | White     | 0.89 (0.52, 1.50)    | 0.65      | 0.93 (0.54, 1.57)      | 0.78      |
| <b>BMI</b>              | Tertile 1 | Tertile 2 | 0.88 (0.60, 1.28)    | 0.49      |                        |           |
|                         | Tertile 3 | Tertile 2 | 0.83 (0.57, 1.21)    | 0.33      |                        |           |
|                         | Missing   | Tertile 2 | 0.58 (0.44, 0.76)    | <.001     |                        |           |
| <b>Systolic BP</b>      | Tertile 1 | Tertile 2 | 0.54 (0.33, 0.90)    | 0.02      |                        |           |
|                         | Tertile 3 | Tertile 2 | 1.18 (0.77, 1.81)    | 0.45      |                        |           |
|                         | Missing   | Tertile 2 | 0.87 (0.63, 1.19)    | 0.38      |                        |           |
| <b>CKD stage</b>        | G2        | G1        | 1.86 (1.08, 3.22)    | 0.03      | 1.77 (1.02, 3.05)      | 0.04      |
|                         | G3a       | G1        | 3.43 (2.01, 5.84)    | <.001     | 3.08 (1.80, 5.26)      | <.001     |
|                         | G3b       | G1        | 5.19 (3.15, 8.54)    | <.001     | 4.22 (2.55, 6.99)      | <.001     |
|                         | G4+5      | G1        | 9.74 (5.94, 15.99)   | <.001     | 7.86 (4.75, 13.00)     | <.001     |
|                         | Missing   | G1        | 3.05 (1.91, 4.86)    | <.001     | 2.81 (1.76, 4.49)      | <.001     |
| <b>eGFR slope</b>       |           |           |                      |           |                        |           |
| <b>Age (10 years)</b>   |           |           | 0.45 (0.30, 0.61)    | <.001     | 0.40 (0.20, 0.50)      | <.001     |
| <b>Gender</b>           | Female    | Male      | 0.22 (-0.29, 0.74)   | 0.40      | 0.60 (0.10, 1.10)      | 0.02      |
| <b>Ethnicity</b>        | Asian     | White     | -1.17 (-2.00, -0.35) | 0.01      | 0.37 (0.21, 0.54)      | 0.004     |
|                         | Black     | White     | -0.56 (-2.65, 1.54)  | 0.60      | 0.61 (0.09, 1.12)      | 0.38      |
|                         | Missing   | White     | -0.49 (-1.28, 0.3)   | 0.22      | -1.18 (-1.99, -0.38)   | 0.24      |
|                         | Mixed     | White     | -0.04 (-3.26, 3.18)  | 0.98      | -0.92 (-2.98, 1.14)    | 0.84      |
|                         | Other     | White     | -0.07 (-1.88, 1.74)  | 0.94      | -0.46 (-1.23, 0.31)    | 0.92      |

|                    |           |           |                     |       |                    |       |
|--------------------|-----------|-----------|---------------------|-------|--------------------|-------|
| <b>BMI</b>         | Tertile 1 | Tertile 2 | -1.13 (-2.59, 0.33) | 0.13  | 0.32 (-2.84, 3.48) |       |
|                    | Tertile 3 | Tertile 2 | -0.88 (-2.29, 0.54) | 0.22  | 0.09 (-1.68, 1.86) |       |
|                    | Missing   | Tertile 2 | 0.39 (-0.67, 1.45)  | 0.47  |                    |       |
| <b>Systolic BP</b> | Tertile 1 | Tertile 2 | -0.57 (-2.02, 0.88) | 0.44  |                    |       |
|                    | Tertile 3 | Tertile 2 | -0.21 (-1.70, 1.28) | 0.78  |                    |       |
|                    | Missing   | Tertile 2 | -0.50 (-1.59, 0.58) | 0.36  |                    |       |
| <b>CKD stage</b>   | G2        | G1        | 0.28 (-0.80, 1.35)  | 0.62  |                    | 0.83  |
|                    | G3a       | G1        | 0.66 (-0.50, 1.82)  | 0.27  |                    | 0.54  |
|                    | G3b       | G1        | 1.24 (0.18, 2.30)   | 0.02  | 0.12 (-0.95, 1.19) | 0.19  |
|                    | G4+5      | G1        | 3.04 (1.84, 4.23)   | <.001 | 0.36 (-0.80, 1.53) | <.001 |
|                    | Missing   | G1        | 1.67 (0.80, 2.55)   | <.001 | 0.74 (-0.35, 1.83) | 0.001 |

**Abbreviations:** BMI, body mass index; BP, blood pressure; CKD, chronic kidney disease; eGFR, estimated glomerular filtration rate; HR, hazard ratio.

**Supplemental Table 3. Demographic and clinical characteristics at diagnosis and clinical outcomes during follow-up (Populations 1–4)**

| Category                                       | Population 1      |            | Population 2      |            | Population 3      |            | Population 4      |            |
|------------------------------------------------|-------------------|------------|-------------------|------------|-------------------|------------|-------------------|------------|
|                                                | n                 | %          | n                 | %          | N                 | %          | n                 | %          |
| <b>Age at baseline</b>                         | <b>887</b>        | <b>100</b> | <b>454</b>        | <b>100</b> | <b>1,153</b>      | <b>100</b> | <b>535</b>        | <b>100</b> |
| Mean, years (SD)                               | 44 (15)           |            | 43 (15)           |            | 45 (14)           |            | 43 (13)           |            |
| Median, years (Q1, Q3)                         | 42 (32, 54)       |            | 42 (32, 53)       |            | 44 (33, 55)       |            | 42 (32, 52)       |            |
| <b>Gender</b>                                  | <b>887</b>        | <b>100</b> | <b>454</b>        | <b>100</b> | <b>1,153</b>      | <b>100</b> | <b>535</b>        | <b>100</b> |
| Female                                         | 287               | 32         | 151               | 33         | 362               | 31         | 183               | 34         |
| Male                                           | 600               | 68         | 303               | 67         | 791               | 69         | 352               | 66         |
| <b>Ethnicity</b>                               | <b>887</b>        | <b>100</b> | <b>454</b>        | <b>100</b> | <b>1,153</b>      | <b>100</b> | <b>535</b>        | <b>100</b> |
| Asian                                          | 104               | 12         | 60                | 13         | 124               | 11         | 62                | 12         |
| Black                                          | 10                | 1          | 6                 | 1          | 15                | 1          | 6                 | 1          |
| Mixed                                          | 4                 | 0          | 3                 | 1          | 6                 | 1          | 2                 | 0          |
| Other                                          | 17                | 2          | 5                 | 1          | 21                | 2          | 12                | 2          |
| White                                          | 646               | 73         | 329               | 72         | 863               | 75         | 392               | 73         |
| Not stated/missing                             | 106               | 12         | 51                | 11         | 124               | 11         | 61                | 11         |
| <b>BMI at baseline</b>                         | <b>242</b>        | <b>27</b>  | <b>160</b>        | <b>35</b>  | <b>165</b>        | <b>14</b>  | <b>88</b>         | <b>16</b>  |
| Mean, (SD)                                     | 29 (8.3)          |            | 28 (6.2)          |            | 29 (8.9)          |            | 29 (5.8)          |            |
| Median, (Q1, Q3)                               | 28 (24.3, 31.2)   |            | 28 (24.3, 30.6)   |            | 27 (24.4, 30.8)   |            | 29 (24.5, 31.8)   |            |
| <b>Systolic BP at baseline</b>                 | <b>216</b>        | <b>24</b>  | <b>159</b>        | <b>35</b>  | <b>289</b>        | <b>25</b>  | <b>146</b>        | <b>27</b>  |
| Mean, mmHg (SD)                                | 139 (19)          |            | 138 (20)          |            | 135 (17)          |            | 136 (15)          |            |
| Median, mmHg (Q1, Q3)                          | 138 (126, 152)    |            | 138 (124, 152)    |            | 133 (123, 144)    |            | 135 (124, 148)    |            |
| <b>UPCR* at baseline</b>                       | <b>498</b>        | <b>56</b>  | <b>454</b>        | <b>100</b> | <b>1,153</b>      | <b>100</b> | <b>535</b>        | <b>100</b> |
| Mean, g/g (SD)                                 | 2.39 (3.63)       |            | 2.44 (3.73)       |            | 1.21 (1.51)       |            | 1.98 (1.53)       |            |
| Median, g/g (Q1, Q3)                           | 1.51 (0.64, 3.00) |            | 1.54 (0.70, 3.13) |            | 0.74 (0.25, 1.57) |            | 1.49 (1.10, 2.20) |            |
| Nephrotic range proteinuria ( $\geq 2.64$ g/g) | 150               | 17         | 137               | 30         | 1,023             | 89         | 99                | 19         |
| <b>eGFR at baseline</b>                        | <b>551</b>        | <b>62</b>  | <b>376</b>        | <b>83</b>  | <b>920</b>        | <b>80</b>  | <b>535</b>        | <b>100</b> |
| Mean, mL/min/1.73m <sup>2</sup> (SD)           | 57 (30)           |            | 59 (29)           |            | 57 (29)           |            | 61 (26)           |            |
| Median, mL/min/1.73m <sup>2</sup> (Q1, Q3)     | 50 (33, 78)       |            | 52 (34, 79)       |            | 50 (34, 77)       |            | 53 (40, 77)       |            |
| <b>CKD stage</b>                               | <b>551</b>        | <b>62</b>  | <b>376</b>        | <b>83</b>  | <b>920</b>        | <b>80</b>  | <b>535</b>        | <b>100</b> |
| Stage 1                                        | 97                | 18         | 66                | 18         | 146               | 16         | 86                | 16         |
| Stage 2                                        | 121               | 22         | 92                | 24         | 222               | 24         | 136               | 25         |
| Stage 3                                        | 229               | 42         | 158               | 42         | 395               | 43         | 313               | 59         |
| Stage 4                                        | 100               | 18         | 56                | 15         | 154               | 17         | 0                 | 0          |
| Stage 5                                        | 4                 | 1          | 4                 | 1          | 3                 | 0          | 0                 | 0          |
| <b>Time from biopsy to baseline</b>            | -                 | -          | -                 | -          | <b>1,153</b>      | <b>100</b> | <b>535</b>        | <b>100</b> |
| Mean, years (SD)                               | -                 |            | -                 |            | 4.1 (6.2)         |            | 4.7 (6.5)         |            |



|                                                  |                   |                   |                   |                   |
|--------------------------------------------------|-------------------|-------------------|-------------------|-------------------|
| Median, years (Q1, Q3)                           | -                 | -                 | 1.3 (0.7, 5.1)    | 2.1 (0.8, 5.9)    |
| <b>Length of follow-up</b>                       | <b>887</b>        | <b>100</b>        | <b>454</b>        | <b>100</b>        |
| Mean, years (SD)                                 | 5.1 (3.3)         | 4.9 (3.2)         | 5.2 (3.6)         | 4.7 (3.2)         |
| Median, years (Q1, Q3)                           | 4.5 (2.5, 6.8)    | 4.4 (2.4, 6.5)    | 4.4 (2.6, 7.0)    | 4.3 (2.5, 5.9)    |
| <b>Kidney failure or death event</b>             | <b>887</b>        | <b>100</b>        | <b>454</b>        | <b>100</b>        |
| Yes                                              | 347               | 39                | 170               | 37                |
| No                                               | 540               | 61                | 284               | 63                |
| <b>First event</b>                               | <b>347</b>        | <b>39</b>         | <b>170</b>        | <b>37</b>         |
| Death                                            | 11                | 3                 | 6                 | 4                 |
| Dialysis                                         | 36                | 10                | 14                | 8                 |
| Transplant                                       | 14                | 4                 | 8                 | 5                 |
| eGFR <15                                         | 286               | 82                | 142               | 84                |
| <b>Time to first event</b>                       | <b>347</b>        | <b>39</b>         | <b>170</b>        | <b>37</b>         |
| Mean, years (SD)                                 | 4.0 (3.1)         | 3.9 (2.9)         | 4.5 (3.3)         | 4.7 (3.2)         |
| Median, years (Q1, Q3)                           | 3.1 (1.5, 5.6)    | 3.1 (1.6, 5.3)    | 3.8 (2.1, 5.9)    | 4.2 (2.6, 5.5)    |
| <b>Age at first event</b>                        | <b>347</b>        | <b>39</b>         | <b>170</b>        | <b>37</b>         |
| Mean, years (SD)                                 | 48 (15)           | 49 (14)           | 51 (14)           | 48 (13)           |
| Median, years (Q1, Q3)                           | 47 (37, 58)       | 46 (38, 59)       | 51 (41, 61)       | 47 (37, 57)       |
| <b>Survival rate, estimate (95% CI)</b>          | <b>887</b>        | <b>100</b>        | <b>454</b>        | <b>100</b>        |
| 2.5-year                                         | 0.83 (0.80-0.85)  | 0.83 (0.79-0.86)  | 0.89 (0.87-0.90)  | 0.91 (0.89-0.94)  |
| 5-year                                           | 0.69 (0.66-0.72)  | 0.69 (0.64-0.73)  | 0.72 (0.69-0.75)  | 0.71 (0.66-0.75)  |
| 10-year                                          | 0.46 (0.41-0.51)  | 0.44 (0.36-0.51)  | 0.50 (0.45-0.54)  | 0.42 (0.34-0.50)  |
| 15-year                                          | 0.27 (0.19-0.36)  | 0.22 (0.09-0.38)  | 0.31 (0.24-0.38)  | 0.25 (0.14-0.37)  |
| 20-year                                          | 0.27 (0.19-0.36)  | NE (NE-NE)        | 0.20 (0.12-0.30)  | NE (NE-NE)        |
| <b>Quartile survival estimate, year (95% CI)</b> | <b>887</b>        | <b>100</b>        | <b>454</b>        | <b>100</b>        |
| 75%                                              | 3.9 (3.4-4.5)     | 4.1 (3.2-4.8)     | 4.6 (4.2-5.0)     | 4.7 (4.3, 5.0)    |
| 50%                                              | 8.7 (7.5-10.2)    | 8.2 (7.4-10.1)    | 10.0 (8.6-12.1)   | 8.9 (7.5, 10.9)   |
| 25%                                              | NE (13.5-NE)      | 14.8 (13.0-NE)    | 17.8 (14.6-NE)    | 14.6 (14.0-NE)    |
| <b>eGFR slope, total</b>                         | <b>837</b>        | <b>94</b>         | <b>422</b>        | <b>93</b>         |
| Mean, mL/min/1.73m <sup>2</sup> /year (SD)       | -3.8 (8.1)        | -4.0 (7.0)        | -3.6 (7.0)        | -5.3 (7.3)        |
| Median, mL/min/1.73m <sup>2</sup> /year (Q1, Q3) | -2.6 (-6.0, -0.4) | -2.8 (-6.5, -0.5) | -2.3 (-5.2, -0.5) | -3.7 (-7.2, -1.4) |

**Abbreviations:** BMI, body mass index; BP, blood pressure; CI, confidence interval; CKD, chronic kidney disease; eGFR, estimated glomerular filtration rate; NE, not estimable; SD, standard deviation; UPCR, urinary protein-creatinine ratio.

\*0.0088 g/g = 1 mg/mmol

**Supplemental Table 4. Clinical outcomes in proteinuria analysis Population 1**

| Proteinuria Analysis Population 1                              |                     |                     |                     |                     |                       |                     |                     |                     |                       |
|----------------------------------------------------------------|---------------------|---------------------|---------------------|---------------------|-----------------------|---------------------|---------------------|---------------------|-----------------------|
| Time-averaged proteinuria* duration                            |                     | Total               |                     |                     |                       | 0-24 months         |                     |                     |                       |
| Time-averaged proteinuria category                             | Overall             | <0.44 g/g           | 0.44 to <0.88 g/g   | 0.88 to <1.76 g/g   | ≥1.76 g/g             | <0.44 g/g           | 0.44 to <0.88 g/g   | 0.88 to <1.76 g/g   | ≥1.76 g/g             |
| <b>Survival rate, estimate (95% CI)</b>                        |                     |                     |                     |                     |                       |                     |                     |                     |                       |
|                                                                | <b>n = 887</b>      | <b>n = 215</b>      | <b>n = 175</b>      | <b>n = 251</b>      | <b>n = 246</b>        | <b>n = 247</b>      | <b>n = 168</b>      | <b>n = 230</b>      | <b>n = 242</b>        |
| 5-year                                                         | 0.69<br>(0.66-0.72) | 0.88<br>(0.82-0.92) | 0.88<br>(0.81-0.92) | 0.70<br>(0.64-0.76) | 0.40<br>(0.33-0.46)   | 0.89<br>(0.83-0.92) | 0.83<br>(0.76-0.89) | 0.68<br>(0.60-0.74) | 0.41<br>(0.34-0.47)   |
| 15-year                                                        | 0.27<br>(0.19-0.36) | 0.57<br>(0.36-0.73) | 0.33<br>(0.09-0.61) | 0.14<br>(0.04-0.31) | 0.10<br>(0.03-0.21)   | 0.52<br>(0.36-0.66) | NE<br>(NE-NE)       | 0.09<br>(0.02-0.23) | 0.21<br>(0.14-0.30)   |
| <b>Quartile time-to-event, year (95% CI)</b>                   |                     |                     |                     |                     |                       |                     |                     |                     |                       |
| 75%                                                            | 3.9<br>(3.4-4.5)    | 10.1<br>(7.2-12.8)  | 7.9<br>(5.7-11.2)   | 4.1<br>(3.4-5.2)    | 1.5<br>(1.4-1.8)      | 8.2<br>(6.2-10.2)   | 6.3<br>(5.1-7.6)    | 3.8<br>(2.8-4.9)    | 1.5<br>(1.3-1.8)      |
| 50%                                                            | 8.7<br>(7.5-10.2)   | NE<br>(NE-NE)       | 13.0<br>(11.2-NE)   | 7.5<br>(6.3-9.7)    | 3.7<br>(3.2-4.5)      | NE<br>(NE-NE)       | 13.5<br>(7.9-NE)    | 7.2<br>(6.2-9.7)    | 3.9<br>(3.2-4.5)      |
| 25%                                                            | 15.2<br>(13.5-NE)   | NE<br>(NE-NE)       | NE<br>(NE-NE)       | 13.0<br>(10.3-NE)   | 6.8<br>(5.9-8.4)      | NE<br>(NE-NE)       | NE<br>(NE-NE)       | 12.3<br>(10.2-15.0) | 8.4<br>(6.0-NE)       |
| <b>eGFR slope, 0-24 months (mL/min/1.73m<sup>2</sup>/year)</b> |                     |                     |                     |                     |                       |                     |                     |                     |                       |
|                                                                | <b>n = 887</b>      | <b>n = 215</b>      | <b>n = 175</b>      | <b>n = 251</b>      | <b>n = 246</b>        | <b>n = 247</b>      | <b>n = 168</b>      | <b>n = 230</b>      | <b>n = 242</b>        |
| Mean (SD)                                                      | -2.5<br>(10.9)      | 1.5<br>(10.8)       | -0.2<br>(7.9)       | -2.2<br>(9.2)       | -8.5<br>(11.9)        | 1.2<br>(10.8)       | -1.1<br>(6.6)       | -2.0<br>(10.2)      | -8.1<br>(12.0)        |
| Median (IQR)                                                   | -2.6<br>(-7.4, 1.5) | 0.0<br>(-2.9, 4.3)  | -1.6<br>(-5.1, 2.3) | -2.7<br>(-6.5, 0.8) | -7.9<br>(-12.8, -2.7) | -0.1<br>(-4.0, 4.3) | -1.6<br>(-4.7, 1.8) | -2.9<br>(-6.4, 0.7) | -7.5<br>(-12.4, -2.1) |

**Abbreviations:** CI, confidence interval; eGFR, estimated glomerular filtration rate; IQR, interquartile range; SD, standard deviation.

\* 0.44 g/g = 50 mg/mmol (~0.5 g/day); 0.88 g/g = 100 mg/mmol (~1 g/day); 1.76 g/g = 200 mg/mmol (~2 g/day)

**Supplemental Table 5. Clinical outcomes in Proteinuria Analysis Populations 2 and 3**

| <b>Proteinuria Analysis Population 2</b>                       |                     |                     |                     |                             |                             |                      |                     |                     |                             |                             |                       |
|----------------------------------------------------------------|---------------------|---------------------|---------------------|-----------------------------|-----------------------------|----------------------|---------------------|---------------------|-----------------------------|-----------------------------|-----------------------|
| <b>Baseline UPCR*</b>                                          |                     | <b>&lt;0.88 g/g</b> |                     |                             |                             |                      | <b>≥0.88 g/g</b>    |                     |                             |                             |                       |
| <b>Total Time-averaged proteinuria category</b>                | <b>Overall</b>      | <b>Combined</b>     | <b>&lt;0.44 g/g</b> | <b>0.44 to &lt;0.88 g/g</b> | <b>0.88 to &lt;1.76 g/g</b> | <b>≥1.76 g/g</b>     | <b>Combined</b>     | <b>&lt;0.44 g/g</b> | <b>0.44 to &lt;0.88 g/g</b> | <b>0.88 to &lt;1.76 g/g</b> | <b>≥1.76 g/g</b>      |
|                                                                | <b>n = 454</b>      | <b>n = 138</b>      | <b>n = 70</b>       | <b>n = 34</b>               | <b>n = 20</b>               | <b>n = 14</b>        | <b>n = 316</b>      | <b>n = 39</b>       | <b>n = 61</b>               | <b>n = 96</b>               | <b>n = 120</b>        |
| <b>%</b>                                                       |                     | Reference           | 50.7%               | 24.6%                       | 14.5%                       | 10.1%                | Reference           | 12.3%               | 19.3%                       | 30.4%                       | 38.0%                 |
| <b>Survival rate, estimate (95% CI)</b>                        |                     |                     |                     |                             |                             |                      |                     |                     |                             |                             |                       |
| 5-year                                                         | 0.69<br>(0.64-0.73) | 0.88<br>(0.81-0.93) | 0.92<br>(0.80-0.97) | 0.97<br>(0.81-1.00)         | 0.81<br>(0.51-0.94)         | 0.64<br>(0.34-0.83)  | 0.61<br>(0.55-0.67) | 0.87<br>(0.71-0.94) | 0.82<br>(0.69-0.90)         | 0.63<br>(0.52-0.73)         | 0.40<br>(0.30-0.49)   |
| 10-year                                                        | 0.44<br>(0.36-0.51) | 0.61<br>(0.45-0.74) | 0.74<br>(0.48-0.89) | 0.90<br>(0.60-0.98)         | 0.40<br>(0.08-0.72)         | 0.13<br>(0.01-0.42)  | 0.37<br>(0.29-0.45) | 0.80<br>(0.59-0.91) | 0.70<br>(0.51-0.83)         | 0.29<br>(0.13-0.47)         | 0.14<br>(0.06-0.25)   |
| 15-year                                                        | 0.22<br>(0.09-0.38) | 0.42<br>(0.22-0.61) | 0.25<br>(0.01-0.65) | NE<br>(NE- NE)              | NE<br>(NE-NE)               | NE<br>(NE-NE)        | NE<br>(NE-NE)       | NE<br>(NE-NE)       | NE<br>(NE-NE)               | NE<br>(NE-NE)               | NE<br>(NE-NE)         |
| <b>Quartile time-to-event, year (95% CI)</b>                   |                     |                     |                     |                             |                             |                      |                     |                     |                             |                             |                       |
| 75%                                                            | 4.1<br>(3.2-4.8)    | 7.2<br>(6.1-8.7)    | 7.7<br>(6.2-12.0)   | 10.2<br>(6.8-NE)            | 5.2<br>(1.5-8.7)            | 3.4<br>(1.2-5.2)     | 3.0<br>(2.3-3.9)    | 10.2<br>(2.30-NE)   | 7.7<br>(4.3-13.0)           | 3.8<br>(2.3-4.7)            | 1.7<br>(1.4-2.2)      |
| 50%                                                            | 8.2<br>(7.4-10.1)   | 10.2<br>(8.7-NE)    | 10.1<br>(7.7-NE)    | NE<br>(NE-NE)               | 8.7<br>(5.2-NE)             | 5.2<br>(1.5-8.7)     | 7.2<br>(5.8-8.2)    | NE<br>(NE-NE)       | 13.0<br>(12.8-NE)           | 7.1<br>(5.2-9.7)            | 3.9<br>(2.7-4.9)      |
| 25%                                                            | 14.8<br>(13.0-NE)   | NE<br>(NE-NE)       | 12.0<br>(10.1-NE)   | NE<br>(NE-NE)               | NE<br>(NE-NE)               | 8.7<br>(5.16-NE)     | 13.5<br>(12.8-NE)   | NE<br>(NE-NE)       | NE<br>(NE-NE)               | 13.5<br>(8.7-NE)            | 7.2<br>(5.8-NE)       |
| <b>Kidney failure risk (10-year), HR (95% Wald CL)</b>         |                     |                     |                     |                             |                             |                      |                     |                     |                             |                             |                       |
| Unadjusted                                                     | N/A                 | Reference           | Reference           | 0.47<br>(0.10-2.28)         | 2.99<br>(1.00-8.91)         | 6.75<br>(2.56-17.77) | 2.75<br>(1.79-4.21) | Reference           | 1.06<br>(0.40-2.83)         | 3.00<br>(1.28-7.09)         | 6.06<br>(2.64-13.90)  |
| Adjusted                                                       | N/A                 | Reference           | Reference           | 0.62<br>(0.11-3.40)         | 3.40<br>(1.00-11.58)        | 13.08 (3.86-44.30)   | 2.65<br>(1.72-4.09) | Reference           | 0.89<br>(0.33-2.41)         | 2.74<br>(1.15-6.51)         | 7.06<br>(3.05-16.31)  |
| <b>eGFR slope, 6-30 months (mL/min/1.73m<sup>2</sup>/year)</b> |                     |                     |                     |                             |                             |                      |                     |                     |                             |                             |                       |
|                                                                | <b>n = 398</b>      | <b>n = 122</b>      | <b>n = 63</b>       | <b>n = 29</b>               | <b>n = 18</b>               | <b>n = 12</b>        | <b>n = 276</b>      | <b>n = 36</b>       | <b>n = 53</b>               | <b>n = 87</b>               | <b>n = 100</b>        |
| Mean (SD)                                                      | -2.8<br>(10.0)      | 0.4<br>(11.4)       | 1.5<br>(13.8)       | 0.9<br>(8.5)                | -2.6<br>(7.8)               | -1.9<br>(7.7)        | -4.3<br>(9.0)       | 1.2<br>(7.7)        | -0.2<br>(8.1)               | -3.3<br>(6.3)               | -9.2<br>(9.5)         |
| Median (IQR)                                                   | -2.4<br>(-7.7, 1.7) | -0.9<br>(-4.7, 4.4) | 0.4<br>(-4.3, 4.6)  | -0.3<br>(-2.8, 5.5)         | -3.8<br>(-5.4, 2.7)         | -1.9<br>(-5.8, 3.6)  | -3.2<br>(-8.8, 0.7) | 0.9<br>(-2.3, 5.2)  | -1.6<br>(-4.2, 2.7)         | -2.6<br>(-6.3, 0.6)         | -8.8<br>(-14.7, -3.1) |
| <b>eGFR slope, total (mL/min/1.73m<sup>2</sup>/year)</b>       |                     |                     |                     |                             |                             |                      |                     |                     |                             |                             |                       |
|                                                                | <b>n = 422</b>      | <b>n = 128</b>      | <b>n = 67</b>       | <b>n = 30</b>               | <b>n = 19</b>               | <b>n = 12</b>        | <b>n = 294</b>      | <b>n = 38</b>       | <b>n = 59</b>               | <b>n = 92</b>               | <b>n = 105</b>        |

|                                                                     |                      |                      |                     |                             |                             |                      |                      |                      |                             |                             |                       |
|---------------------------------------------------------------------|----------------------|----------------------|---------------------|-----------------------------|-----------------------------|----------------------|----------------------|----------------------|-----------------------------|-----------------------------|-----------------------|
| Mean (SD)                                                           | -4.0<br>(7.0)        | -1.5<br>(5.8)        | 0.1<br>(6.0)        | -1.3<br>(3.5)               | -3.8<br>(4.2)               | -7.6<br>(7.3)        | -5.1<br>(7.2)        | -0.6<br>(6.0)        | -1.2<br>(4.2)               | -4.4<br>(5.0)               | -9.7<br>(7.9)         |
| Median (IQR)                                                        | -2.8<br>(-6.5, -0.5) | -1.5<br>(-3.7, 0.4)  | -0.5<br>(-2.4, 1.8) | -1.7<br>(-3.0, -0.8)        | -3.3<br>(-5.1, -1.9)        | -6.0<br>(-9.6, -3.2) | -3.4<br>(-8.0, -0.8) | -0.2<br>(-1.6, 1.3)  | -1.2<br>(-2.8, 0.1)         | -3.7<br>(-6.3, -1.3)        | -8.9<br>(-13.4, -4.0) |
| <b>Proteinuria Analysis Population 3</b>                            |                      |                      |                     |                             |                             |                      |                      |                      |                             |                             |                       |
| <b>Baseline UPCR*</b>                                               |                      | <b>&lt;0.88 g/g</b>  |                     |                             |                             |                      | <b>≥0.88 g/g</b>     |                      |                             |                             |                       |
| <b>Total Time-averaged proteinuria category</b>                     | <b>Overall</b>       | <b>Combined</b>      | <b>&lt;0.44 g/g</b> | <b>0.44 to &lt;0.88 g/g</b> | <b>0.88 to &lt;1.76 g/g</b> | <b>≥1.76 g/g</b>     | <b>Combined</b>      | <b>&lt;0.44 g/g</b>  | <b>0.44 to &lt;0.88 g/g</b> | <b>0.88 to &lt;1.76 g/g</b> | <b>≥1.76 g/g</b>      |
|                                                                     | <b>n = 1,153</b>     | <b>n = 638</b>       | <b>n = 302</b>      | <b>n = 150</b>              | <b>n = 141</b>              | <b>n = 45</b>        | <b>n = 515</b>       | <b>n = 16</b>        | <b>n = 77</b>               | <b>n = 210</b>              | <b>n = 212</b>        |
| %                                                                   |                      | Reference            | 47.3%               | 23.5%                       | 22.1%                       | 7.1%                 | Reference            | 3.1%                 | 15.0%                       | 40.8%                       | 41.2%                 |
| <b>Quartile time-to-event, year (95% CI)</b>                        |                      |                      |                     |                             |                             |                      |                      |                      |                             |                             |                       |
| 75%                                                                 | 4.6<br>(4.2-5.0)     | 6.8<br>(6.2-7.9)     | NE<br>(NE-NE)       | 12.2<br>(7.1-13.9)          | 5.0<br>(4.1-5.9)            | 4.1<br>(2.5-4.8)     | 3.18<br>(2.9-3.5)    | 9.3<br>(9.3-NE)      | 6.9<br>(3.3-9.0)            | 4.4<br>(3.7-4.8)            | 2.1<br>(1.6-2.4)      |
| 50%                                                                 | 10.0<br>(8.6-12.1)   | 13.9<br>(12.2-15.4)  | NE<br>(NE-NE)       | 14.0<br>(12.3-NE)           | 8.2<br>(6.4-10.6)           | 5.4<br>(4.7-7.5)     | 6.4<br>(5.3-7.5)     | NE<br>(NE-NE)        | 14.0<br>(7.5-NE)            | 8.1<br>(6.4-9.8)            | 3.9<br>(3.2-4.4)      |
| 25%                                                                 | 17.8<br>(14.6-NE)    | NE<br>(NE-NE)        | NE<br>(NE-NE)       | 15.3<br>(14.0-NE)           | 12.8<br>(12.0-NE)           | 14.6<br>(6.7-NE)     | 14.0<br>(11.1-16.7)  | NE<br>(NE-NE)        | NE<br>(NE-NE)               | 12.1<br>(10.0-16.7)         | 7.5<br>(5.8-14.1)     |
| <b>kidney failure risk (10-year), HR (95% Wald CL)</b>              |                      |                      |                     |                             |                             |                      |                      |                      |                             |                             |                       |
| Unadjusted                                                          | N/A                  | Reference            | Reference           | 1.00<br>(0.56-1.81)         | 3.61<br>(2.34-5.56)         | 5.90<br>(3.49-9.97)  | 2.84<br>(2.29-3.52)  | Reference            | 3.55<br>(0.48-26.54)        | 6.01<br>(0.84-43.06)        | 14.10<br>(1.98-100.6) |
| Adjusted                                                            | N/A                  | Reference            | Reference           | 0.88<br>(0.49-1.60)         | 3.13<br>(2.01-4.88)         | 4.61<br>(2.69-7.90)  | 2.80<br>(2.25-3.49)  | Reference            | 5.19<br>(0.69-39.05)        | 8.44<br>(1.17-61.00)        | 29.53<br>(4.09-213.2) |
| <b>eGFR slope, 6-30 months (mL/min/1.73m<sup>2</sup>/year)</b>      |                      |                      |                     |                             |                             |                      |                      |                      |                             |                             |                       |
|                                                                     | <b>n = 921</b>       | <b>n = 507</b>       | <b>n = 243</b>      | <b>n = 117</b>              | <b>n = 115</b>              | <b>n = 32</b>        | <b>n = 414</b>       | <b>n = 14</b>        | <b>n = 63</b>               | <b>n = 174</b>              | <b>n = 163</b>        |
| Mean (SD)                                                           | -3.2<br>(9.4)        | -1.4<br>(9.4)        | 0.0<br>(8.8)        | -1.6<br>(7.6)               | -2.8<br>(11.2)              | -6.3<br>(10.7)       | -5.5<br>(9.0)        | -1.3<br>(4.5)        | -2.5<br>(4.9)               | -3.3<br>(7.4)               | -9.4<br>(10.5)        |
| Median (IQR)                                                        | -2.4<br>(-6.9, 0.7)  | -1.2<br>(-4.6, 1.8)  | -0.4<br>(-3.1, 2.8) | -1.2<br>(-5.1, 1.5)         | -3.1<br>(7.2, 0.1)          | -5.3<br>(-8.2, -2.6) | -3.9<br>(-8.5, -0.6) | -1.4<br>(-3.3, 0.3)  | -2.7<br>(-5.0, 0.6)         | -2.7<br>(-6.5, 0.0)         | -7.3<br>(-13.4, -2.8) |
| <b>eGFR slope, total (mL/min/1.73m<sup>2</sup>/year), mean (SD)</b> |                      |                      |                     |                             |                             |                      |                      |                      |                             |                             |                       |
|                                                                     | <b>n = 1042</b>      | <b>n = 588</b>       | <b>n = 281</b>      | <b>n = 135</b>              | <b>n = 132</b>              | <b>n = 40</b>        | <b>n = 454</b>       | <b>n = 15</b>        | <b>n = 71</b>               | <b>n = 189</b>              | <b>n = 179</b>        |
| Mean (SD)                                                           | -3.6<br>(7.0)        | -1.9<br>(6.0)        | -0.5<br>(3.7)       | -1.8<br>(3.3)               | -3.2<br>(8.9)               | -7.9<br>(9.4)        | -5.8<br>(7.6)        | -0.7<br>(3.1)        | -1.9<br>(3.4)               | -4.0<br>(4.8)               | -9.7<br>(9.6)         |
| Median (IQR)                                                        | -2.3<br>(-5.2, -0.5) | -1.4<br>(-3.6, -0.1) | -0.5<br>(-1.7, 0.8) | -1.7<br>(-3.4, -0.5)        | -3.1<br>(-5.4, -1.5)        | -5.3<br>(-8.2, -2.6) | -3.9<br>(-7.4, -1.6) | -1.2<br>(-2.2, -0.3) | -1.8<br>(-2.9, -0.3)        | -3.1<br>(-5.4, -1.4)        | -6.8<br>(-13.2, -4.0) |

**Abbreviations:** **CI**, confidence interval; **eGFR**, estimated glomerular filtration rate; **HR**, hazard ratio; **IQR**, interquartile range; **SD**, standard deviation; **UPCR**, urinary protein-creatinine ratio.

\* 0.44 g/g = 50 mg/mmol (~0.5 g/day); 0.88 g/g = 100 mg/mmol (~1 g/day); 1.76 g/g = 200 mg/mmol (~2 g/day)

**Supplemental Table 6. Clinical outcomes in Proteinuria Analysis Population 4**

| <b>Proteinuria Analysis Population 4</b>     |                     |                     |                     |                             |                     |                     |                     |                             |                     |
|----------------------------------------------|---------------------|---------------------|---------------------|-----------------------------|---------------------|---------------------|---------------------|-----------------------------|---------------------|
| <b>Time-averaged proteinuria* duration</b>   |                     | <b>6-12 months</b>  |                     |                             |                     | <b>6-24 months</b>  |                     |                             |                     |
| <b>Time-averaged proteinuria category</b>    | <b>Overall</b>      | <b>Combined</b>     | <b>&lt;0.44 g/g</b> | <b>0.88 to &lt;1.76 g/g</b> | <b>≥1.76 g/g</b>    | <b>Combined</b>     | <b>&lt;0.44 g/g</b> | <b>0.88 to &lt;1.76 g/g</b> | <b>≥1.76 g/g</b>    |
| <b>Survival rate, estimate (95% CI)</b>      |                     |                     |                     |                             |                     |                     |                     |                             |                     |
|                                              | <b>n = 535</b>      | <b>n = 410</b>      | <b>n = 125</b>      | <b>n = 158</b>              | <b>n = 127</b>      | <b>n = 509</b>      | <b>n = 152</b>      | <b>n = 200</b>              | <b>n = 157</b>      |
| 2.5-year                                     | 0.91<br>(0.89-0.94) | 0.90<br>(0.86-0.93) | 0.97<br>(0.92-0.99) | 0.93<br>(0.87-0.96)         | 0.79<br>(0.70-0.85) | 0.91<br>(0.88-0.93) | 0.98<br>(0.94-1.00) | 0.94<br>(0.90-0.97)         | 0.81<br>(0.73-0.86) |
| <b>Quartile time-to-event, year (95% CI)</b> |                     |                     |                     |                             |                     |                     |                     |                             |                     |
| 75%                                          | 4.7<br>(4.3-5.0)    | 4.5<br>(4.0-5.0)    | 6.0<br>(4.7-7.9)    | 4.9<br>(4.4-6.9)            | 2.9<br>(2.3-3.2)    | 4.6<br>(4.2-5.0)    | 6.9<br>(5.3-10.9)   | 4.7<br>(4.2-5.4)            | 2.9<br>(2.3-3.5)    |
| 50%                                          | 8.9<br>(7.5-10.9)   | 8.0<br>(7.2-9.4)    | 10.9<br>(7.5-NE)    | 8.9<br>(7.4-11.8)           | 5.1<br>(3.9-5.9)    | 8.3<br>(7.4-10.9)   | 14.6<br>(8.9-NE)    | 9.4<br>(6.0-14.1)           | 5.3<br>(4.5-7.6)    |
| 25%                                          | 14.6<br>(14.0-NE)   | 14.6<br>(10.9-NE)   | 14.6<br>(10.9-NE)   | NE<br>(11.3-NE)             | 8.3<br>(7.2-NE)     | NE<br>(14.0-NE)     | NE<br>(14.6-NE)     | NE<br>(14.0-NE)             | 8.4<br>(8.0-NE)     |

**Abbreviations:** CI, confidence interval.

\* 0.44 g/g = 50 mg/mmol (~0.5 g/day); 0.88 g/g = 100 mg/mmol (~1 g/day); 1.76 g/g = 200 mg/mmol (~2 g/day)

**Supplemental Table 7. Univariable and multivariable analysis of 10-year survival and eGFR slope (Populations 1–4)**

| Description             | Variable  | Reference | Population 1 |            |               |            | Population 2 |            |               |            | Population 3 |            |               |            | Population 4 |            |               |            |
|-------------------------|-----------|-----------|--------------|------------|---------------|------------|--------------|------------|---------------|------------|--------------|------------|---------------|------------|--------------|------------|---------------|------------|
|                         |           |           | Univariable  |            | Multivariable |            | Univariable  |            | Multivariable |            | Univariable  |            | Multivariable |            | Univariable  |            | Multivariable |            |
|                         |           |           | HR           | P > ChiS q | HR            | P > ChiS q | HR           | P > ChiS q | HR            | P > ChiS q | HR           | P > ChiS q | HR            | P > ChiS q | HR           | P > ChiS q | HR            | P > ChiS q |
| <b>10-year survival</b> |           |           |              |            |               |            |              |            |               |            |              |            |               |            |              |            |               |            |
| <b>Age</b>              |           |           | 1.01         | 0.11       | 0.99          | 0.12       | 1.01         | 0.10       | 0.99          | 0.24       | 1.01         | 0.001      | 1.00          | 0.27       | 1.00         | 0.80       | 0.97          | <.001      |
| <b>Gender</b>           | Female    | Male      | 0.66         | 0.001      | 0.66          | 0.002      | 0.56         | 0.004      | 0.57          | 0.01       | 0.67         | 0.002      | 0.70          | 0.01       | 0.51         | 0.00       | 0.48          | <.001      |
| <b>Ethnicity</b>        | Asian     | White     | 1.49         | 0.01       | 1.58          | 0.01       | 1.33         | 0.20       | 1.41          | 0.13       | 1.02         | 0.92       | 0.94          | 0.73       | 0.79         | 0.37       | 1.01          | 0.98       |
|                         | Black     | White     | 2.88         | 0.01       | 1.86          | 0.14       | 2.47         | 0.12       | 1.86          | 0.30       | 1.22         | 0.66       | 1.14          | 0.78       | 0.92         | 0.91       | 1.17          | 0.83       |
|                         | Missing   | White     | 1.10         | 0.60       | 1.07          | 0.69       | 1.15         | 0.59       | 1.13          | 0.63       | 0.77         | 0.15       | 0.77          | 0.16       | 0.61         | 0.07       | 0.60          | 0.07       |
|                         | Mixed     | White     | 1.85         | 0.39       | 1.18          | 0.82       | 1.07         | 0.94       | 0.61          | 0.63       | 0.39         | 0.34       | 0.48          | 0.46       | 1.09         | 0.94       | 0.80          | 0.83       |
|                         | Other     | White     | 0.46         | 0.18       | 0.52          | 0.26       | 0.71         | 0.73       | 0.47          | 0.45       | 0.43         | 0.14       | 0.44          | 0.15       | 0.69         | 0.60       | 0.47          | 0.30       |
| <b>UPCR</b>             | ≥0.88 g/g | <0.88 g/g | 2.40         | <.001      | 2.19          | <.001      | 2.75         | <.001      | 2.65          | <.001      | 2.84         | <.001      | 2.80          | <.001      | N/A          | N/A        | N/A           | N/A        |
|                         | Missing   | <0.88 g/g | 1.71         | 0.01       | 1.37          | 0.118      | N/A          | N/A        | N/A           | N/A        | N/A          | N/A        | N/A           | N/A        | N/A          | N/A        | N/A           | N/A        |
| <b>CKD stage</b>        | G2        | G1        | 1.63         | 0.21       | 1.57          | 0.25       | 1.51         | 0.33       | 1.38          | 0.45       | 1.76         | 0.11       | 1.59          | 0.19       | 1.37         | 0.37       | 1.84          | 0.09       |
|                         | G3a       | G1        | 3.51         | <.001      | 3.46          | <.001      | 3.05         | 0.01       | 2.64          | 0.02       | 2.95         | 0.02       | 2.67          | 0.01       | 2.34         | 0.01       | 3.85          | <.001      |
|                         | G3b       | G1        | 5.26         | <.001      | 5.02          | <.001      | 4.11         | <.001      | 3.78          | 0.001      | 5.98         | <.001      | 5.33          | <.001      | 4.56         | <.001      | 8.64          | <.001      |
|                         | G4+5      | G1        | 8.87         | <.001      | 8.58          | <.001      | 6.32         | <.001      | 5.51          | <.001      | 12.30        | <.001      | 12.46         | <.001      | N/A          | N/A        | N/A           | N/A        |
|                         | Missing   | G1        | 4.23         | <.001      | 4.64          | <.001      | 4.31         | <.001      | 4.14          | <.001      | 4.56         | <.001      | 4.32          | <.001      | N/A          | N/A        | N/A           | N/A        |
| <b>eGFR slope</b>       |           |           |              |            |               |            |              |            |               |            |              |            |               |            |              |            |               |            |
| <b>Age</b>              |           |           | 0.72         | <.001      | 0.61          | <.001      | 0.76         | <.001      | 0.63          | 0.002      | 0.73         | <.001      | 0.68          | <.001      | 0.98         | <.001      | 1.06          | <.001      |
| <b>Gender</b>           | Female    | Male      | 0.17         | 0.69       | 0.95          | 0.02       | -0.16        | 0.79       | 0.81          | 0.18       | -0.15        | 0.63       | 0.36          | 0.22       | 0.78         | 0.13       | 1.45          | 0.01       |
| <b>Ethnicity</b>        | Asian     | White     | -1.71        | 0.01       | -1.35         | 0.03       | -1.22        | 0.15       | -0.74         | 0.37       | -0.62        | 0.19       | -0.14         | 0.76       | 0.18         | 0.82       | 0.02          | 0.97       |
|                         | Black     | White     | -0.97        | 0.67       | -0.19         | 0.93       | -1.77        | 0.53       | -1.35         | 0.62       | -1.17        | 0.37       | -0.53         | 0.66       | -0.94        | 0.67       | -1.18         | 0.58       |
|                         | Missing   | White     | -0.89        | 0.14       | -0.89         | 0.13       | -1.19        | 0.18       | -1.05         | 0.23       | -0.31        | 0.51       | -0.16         | 0.70       | -0.28        | 0.71       | 0.04          | 0.96       |
|                         | Mixed     | White     | -0.68        | 0.84       | 0.30          | 0.93       | 0.62         | 0.87       | 1.95          | 0.60       | 1.21         | 0.49       | 1.78          | 0.27       | 1.33         | 0.71       | 1.09          | 0.75       |
|                         | Other     | White     | -1.88        | 0.17       | -1.49         | 0.26       | -1.00        | 0.72       | -0.96         | 0.73       | -0.02        | 0.98       | -0.04         | 0.97       | 1.70         | 0.39       | 1.79          | 0.35       |
| <b>BMI</b>              | Tertile 1 | Tertile 2 | -1.61        | 0.08       | N/A           | N/A        | -1.30        | 0.24       | N/A           | N/A        | -0.11        | 0.90       | N/A           | N/A        | -1.10        | 0.45       | N/A           | N/A        |

|                    |           |           |       |       |       |       |       |       |       |       |       |       |       |       |       |      |       |      |
|--------------------|-----------|-----------|-------|-------|-------|-------|-------|-------|-------|-------|-------|-------|-------|-------|-------|------|-------|------|
|                    | Tertile 3 | Tertile 2 | -1.04 | 0.24  | N/A   | N/A   | -1.40 | 0.21  | N/A   | N/A   | 0.06  | 0.94  | N/A   | N/A   | -1.11 | 0.46 | N/A   | N/A  |
|                    | Missing   | 18 - <24  | 0.40  | 0.55  | N/A   | N/A   | -0.33 | 0.69  | N/A   | N/A   | 0.12  | 0.86  | N/A   | N/A   | 0.25  | 0.81 | N/A   | N/A  |
| <b>Systolic BP</b> | Tertile 1 | Tertile 2 | -0.77 | 0.40  | N/A   | N/A   | -0.92 | 0.41  | N/A   | N/A   | 1.38  | 0.04  | N/A   | N/A   | -0.81 | 0.47 | N/A   | N/A  |
|                    | Tertile 3 | Tertile 2 | -0.63 | 0.50  | N/A   | N/A   | 0.03  | 0.98  | N/A   | N/A   | -0.25 | 0.71  | N/A   | N/A   | -1.65 | 0.14 | N/A   | N/A  |
|                    | Missing   | Tertile 2 | -0.96 | 0.16  | N/A   | N/A   | -0.80 | 0.36  | N/A   | N/A   | 0.09  | 0.87  | N/A   | N/A   | -0.43 | 0.61 | N/A   | N/A  |
| <b>UPCR</b>        | ≥0.88 g/g | <0.88 g/g | -2.60 | <.001 | -2.82 | <.001 | 0.00  | <.001 | -2.61 | <.001 | -2.95 | <.001 | -2.82 | <.001 | N/A   | N/A  | N/A   | N/A  |
|                    | Missing   | <0.88 g/g | -1.17 | 0.026 | -1.52 | 0.01  | -2.34 | N/A   | N/A  | N/A   | N/A  |
| <b>CKD stage</b>   | G2        | G1        | 0.45  | 0.54  | 0.44  | 0.54  | 1.10  | 0.22  | 1.15  | 0.19  | -0.35 | 0.49  | -0.62 | 0.20  | -0.24 | 0.75 | -0.81 | 0.30 |
|                    | G3a       | G1        | 0.74  | 0.36  | 0.50  | 0.53  | 1.61  | 0.11  | 1.55  | 0.12  | -0.54 | 0.32  | -1.01 | 0.06  | 0.22  | 0.78 | -1.23 | 0.13 |
|                    | G3b       | G1        | 1.14  | 0.12  | 0.60  | 0.43  | 2.06  | 0.02  | 1.55  | 0.11  | 0.25  | 0.61  | -0.51 | 0.32  | 1.25  | 0.09 | -0.49 | 0.55 |
|                    | G4+5      | G1        | 3.13  | <.001 | 2.55  | 0.00  | 3.45  | 0.00  | 3.19  | 0.00  | 1.34  | 0.02  | 0.06  | 0.91  | N/A   | N/A  | N/A   | N/A  |
|                    | Missing   | G1        | 1.28  | 0.05  | 0.71  | 0.31  | 2.13  | 0.03  | 1.63  | 0.10  | -0.09 | 0.86  | -0.71 | 0.15  | N/A   | N/A  | N/A   | N/A  |

**Abbreviations:** BMI, body mass index; BP, blood pressure; CKD, chronic kidney disease; eGFR, estimated glomerular filtration rate; HR, hazard ratio; N/A, not applicable; UPCR, urinary protein-creatinine ratio.
